# Supplementary material
Source: PubMed Central journal article supplement (PMC4506757)
Supplement: NIHMS705543-supplement-Supplemental_Tables.pdf [file NIHMS705543-supplement-Supplemental_Tables.pdf]

|                                                           |        |     |     |     |     |     |     |     |     |     |     |     |     |      |     |     |   |   |
|-----------------------------------------------------------|--------|-----|-----|-----|-----|-----|-----|-----|-----|-----|-----|-----|-----|------|-----|-----|---|---|
| Chymotrypsin-C                                            | Q99895 | 0   | 0   | 0   | 0   | 0   | 0   | 0   | 13  | 0   | 0   | 0   | 4   | 0    | 13  | 0   | 1 | 1 |
| Chymotrypsin-like elastase family member 2A               | P08217 | 0   | 0   | 0   | 17  | 0   | 30  | 0   | 13  | 0   | 0   | 16  | 4   | 0    | 47  | 13  | 0 | 2 |
| Chymotrypsin-like elastase family member 3A               | P09093 | 0   | 0   | 9   | 0   | 14  | 32  | 0   | 0   | 0   | 3   | 15  | 0   | 9    | 46  | 0   | 1 |   |
| Chymotrypsin-like elastase family member 3B               | P08861 | 17  | 0   | 0   | 8   | 0   | 0   | 0   | 20  | 0   | 6   | 3   | 7   | 17   | 8   | 20  | 1 |   |
| Clathrin heavy chain 1                                    | Q00610 | 54  | 0   | 0   | 78  | 0   | 0   | 47  | 78  | 0   | 18  | 26  | 42  | 54   | 78  | 125 | 1 |   |
| Clathrin light chain A                                    | P09496 | 0   | 14  | 0   | 0   | 0   | 0   | 0   | 0   | 0   | 5   | 0   | 0   | 14   | 0   | 0   | 1 |   |
| Coagulation factor XIII A chain                           | P00488 | 0   | 0   | 0   | 25  | 0   | 0   | 0   | 0   | 0   | 0   | 8   | 0   | 0    | 25  | 0   | 0 |   |
| Cofilin-1                                                 | P23528 | 42  | 78  | 53  | 36  | 34  | 30  | 47  | 0   | 14  | 58  | 33  | 20  | 173  | 100 | 61  | 3 |   |
| Collagen alpha-1                                          | P02452 | 0   | 103 | 0   | 0   | 0   | 144 | 0   | 0   | 105 | 34  | 48  | 35  | 103  | 144 | 105 | 1 |   |
| Collagen alpha-1                                          | P12109 | 89  | 91  | 0   | 65  | 96  | 68  | 0   | 67  | 56  | 60  | 76  | 41  | 180  | 229 | 123 | 2 |   |
| Collagen alpha-1                                          | P39060 | 0   | 54  | 100 | 0   | 43  | 84  | 38  | 81  | 68  | 51  | 43  | 62  | 154  | 127 | 187 | 2 |   |
| Collagen alpha-1                                          | Q05707 | 0   | 56  | 82  | 0   | 84  | 73  | 0   | 65  | 70  | 46  | 52  | 45  | 138  | 157 | 135 | 2 |   |
| Collagen alpha-1                                          | Q99715 | 0   | 123 | 0   | 143 | 0   | 0   | 0   | 154 | 197 | 41  | 48  | 117 | 123  | 143 | 351 | 1 |   |
| Collagen alpha-2                                          | P08123 | 0   | 0   | 0   | 0   | 0   | 173 | 0   | 193 | 201 | 0   | 58  | 131 | 0    | 173 | 394 | 0 |   |
| Collagen alpha-2                                          | P12110 | 139 | 131 | 176 | 93  | 137 | 98  | 74  | 137 | 108 | 149 | 109 | 106 | 446  | 328 | 319 | 3 |   |
| Collagen alpha-3                                          | P12111 | 218 | 260 | 355 | 213 | 393 | 242 | 172 | 226 | 232 | 278 | 283 | 210 | 833  | 848 | 630 | 3 |   |
| Complement C3                                             | P01024 | 82  | 87  | 0   | 0   | 96  | 103 | 0   | 0   | 0   | 56  | 66  | 0   | 169  | 199 | 0   | 2 |   |
| Complement C4-A                                           | P0COL4 | 0   | 0   | 0   | 0   | 0   | 0   | 0   | 0   | 56  | 0   | 0   | 19  | 0    | 0   | 56  | 0 |   |
| Complement C4-B                                           | P0COL5 | 0   | 0   | 0   | 0   | 0   | 80  | 0   | 0   | 0   | 0   | 27  | 0   | 0    | 80  | 0   | 0 |   |
| Complement component C9                                   | P02748 | 0   | 0   | 0   | 0   | 0   | 0   | 0   | 0   | 21  | 0   | 0   | 7   | 0    | 0   | 21  | 0 |   |
| Coronin-1A                                                | P31146 | 15  | 0   | 0   | 0   | 0   | 0   | 0   | 0   | 0   | 5   | 0   | 0   | 15   | 0   | 0   | 1 |   |
| Coronin-1C                                                | Q9ULV4 | 0   | 0   | 41  | 0   | 0   | 0   | 0   | 0   | 0   | 14  | 0   | 0   | 41   | 0   | 0   | 1 |   |
| C-type mannose receptor 2                                 | Q9UBG0 | 0   | 0   | 0   | 0   | 0   | 34  | 0   | 0   | 26  | 0   | 11  | 9   | 0    | 34  | 26  | 0 |   |
| Cysteine and glycine-rich protein 1                       | P21291 | 7   | 0   | 21  | 0   | 14  | 0   | 0   | 0   | 16  | 9   | 5   | 5   | 28   | 14  | 16  | 2 |   |
| Cytoskeleton-associated protein 4                         | Q07065 | 54  | 0   | 0   | 40  | 0   | 46  | 34  | 0   | 0   | 18  | 29  | 11  | 54   | 86  | 34  | 1 |   |
| Cytosol aminopeptidase                                    | P28838 | 0   | 0   | 0   | 27  | 0   | 0   | 0   | 0   | 0   | 0   | 9   | 0   | 0    | 27  | 0   | 0 |   |
| D-3-phosphoglycerate dehydrogenase                        | O43175 | 0   | 0   | 0   | 25  | 0   | 30  | 0   | 40  | 0   | 0   | 18  | 13  | 0    | 55  | 40  | 0 |   |
| Decorin                                                   | P07585 | 47  | 58  | 0   | 38  | 79  | 0   | 0   | 0   | 0   | 35  | 39  | 0   | 105  | 117 | 0   | 2 |   |
| Deleted in malignant brain tumors 1 protein               | Q9UGM3 | 72  | 76  | 79  | 0   | 0   | 73  | 63  | 63  | 73  | 76  | 24  | 66  | 227  | 73  | 199 | 3 |   |
| Desmin                                                    | P17661 | 109 | 0   | 197 | 0   | 0   | 0   | 67  | 0   | 0   | 102 | 0   | 22  | 306  | 0   | 67  | 2 |   |
| Dihydropyrimidinase-related protein 2                     | Q16555 | 40  | 20  | 0   | 0   | 41  | 0   | 0   | 0   | 47  | 20  | 14  | 16  | 60   | 41  | 47  | 2 |   |
| Dolichyl-diphosphooligosaccharide-- glycosyltransferase 1 | P04843 | 0   | 0   | 0   | 0   | 0   | 0   | 0   | 47  | 0   | 0   | 0   | 16  | 0    | 0   | 47  | 0 |   |
| ELAV-like protein 1                                       | Q15717 | 0   | 0   | 0   | 0   | 0   | 0   | 24  | 0   | 0   | 0   | 0   | 8   | 0    | 24  | 0   | 0 |   |
| Elongation factor 1-gamma                                 | P26641 | 0   | 0   | 0   | 23  | 0   | 0   | 20  | 31  | 0   | 0   | 8   | 17  | 0    | 23  | 51  | 0 |   |
| Elongation factor 2                                       | P13639 | 0   | 0   | 0   | 40  | 0   | 0   | 0   | 51  | 0   | 0   | 13  | 17  | 0    | 40  | 51  | 0 |   |
| EMILIN-1                                                  | Q9Y6C2 | 69  | 131 | 91  | 44  | 101 | 64  | 45  | 58  | 101 | 97  | 70  | 68  | 291  | 209 | 204 | 3 |   |
| Endoplasmic                                               | P14625 | 0   | 0   | 0   | 36  | 0   | 0   | 33  | 0   | 0   | 0   | 12  | 11  | 0    | 36  | 33  | 0 |   |
| Eosinophil cationic protein                               | P12724 | 49  | 14  | 0   | 0   | 0   | 18  | 22  | 7   | 26  | 21  | 6   | 18  | 63   | 18  | 55  | 2 |   |
| Eosinophil peroxidase                                     | P11678 | 99  | 0   | 0   | 0   | 0   | 0   | 0   | 0   | 0   | 33  | 0   | 0   | 99   | 0   | 0   | 1 |   |
| Epiplakin                                                 | P58107 | 0   | 0   | 0   | 0   | 0   | 0   | 165 | 0   | 171 | 0   | 0   | 112 | 0    | 0   | 336 | 0 |   |
| Erythrocyte band 7 integral membrane protein              | P27105 | 0   | 0   | 0   | 0   | 0   | 0   | 0   | 0   | 28  | 0   | 0   | 9   | 0    | 0   | 28  | 0 |   |
| F-actin-capping protein subunit alpha-1                   | P52907 | 0   | 0   | 0   | 32  | 0   | 0   | 0   | 0   | 0   | 0   | 11  | 0   | 0    | 32  | 0   | 0 |   |
| F-actin-capping protein subunit alpha-2                   | P47755 | 0   | 0   | 0   | 23  | 0   | 0   | 0   | 0   | 0   | 0   | 8   | 0   | 0    | 23  | 0   | 0 |   |
| Fatty acid synthase                                       | P49327 | 0   | 0   | 0   | 0   | 0   | 0   | 45  | 0   | 0   | 0   | 0   | 15  | 0    | 0   | 45  | 0 |   |
| Fatty acid-binding protein, liver                         | P07148 | 0   | 0   | 0   | 0   | 0   | 0   | 13  | 0   | 0   | 0   | 0   | 4   | 0    | 13  | 0   | 0 |   |
| Ferritin heavy chain                                      | P02794 | 0   | 0   | 0   | 6   | 31  | 0   | 0   | 0   | 23  | 0   | 12  | 8   | 0    | 37  | 23  | 0 |   |
| Ferritin light chain                                      | P02792 | 0   | 22  | 18  | 11  | 5   | 14  | 11  | 11  | 26  | 13  | 10  | 16  | 40   | 30  | 48  | 2 |   |
| Fibrillin-1                                               | P35555 | 0   | 56  | 147 | 53  | 43  | 0   | 0   | 0   | 70  | 68  | 32  | 23  | 203  | 96  | 70  | 2 |   |
| Fibrillin-2                                               | P35556 | 0   | 70  | 0   | 0   | 0   | 0   | 0   | 49  | 0   | 23  | 0   | 16  | 70   | 0   | 49  | 1 |   |
| Fibrinogen alpha chain                                    | P02671 | 0   | 64  | 0   | 0   | 0   | 98  | 0   | 0   | 0   | 21  | 33  | 0   | 64   | 98  | 0   | 1 |   |
| Fibrinogen beta chain                                     | P02675 | 0   | 58  | 0   | 0   | 0   | 62  | 0   | 0   | 0   | 19  | 21  | 0   | 58   | 62  | 0   | 1 |   |
| Fibronectin                                               | P02751 | 0   | 87  | 0   | 93  | 0   | 66  | 38  | 0   | 138 | 29  | 53  | 59  | 87   | 159 | 176 | 1 |   |
| Fibulin-1                                                 | P23142 | 20  | 16  | 23  | 27  | 22  | 11  | 20  | 0   | 16  | 20  | 20  | 12  | 59   | 60  | 36  | 3 |   |
| Filamin-A                                                 | P21333 | 237 | 217 | 560 | 171 | 247 | 162 | 209 | 215 | 295 | 338 | 193 | 240 | 1014 | 580 | 719 | 3 |   |
| Filamin-B                                                 | O75369 | 0   | 0   | 0   | 0   | 0   | 0   | 51  | 0   | 0   | 0   | 0   | 17  | 0    | 0   | 51  | 0 |   |
| Fructose-bisphosphate aldolase A                          | P04075 | 32  | 58  | 23  | 36  | 34  | 34  | 62  | 36  | 35  | 38  | 35  | 44  | 113  | 104 | 133 | 3 |   |
| Gamma-glutamyltransferase 5                               | P36269 | 0   | 0   | 0   | 0   | 17  | 0   | 0   | 0   | 28  | 0   | 6   | 9   | 0    | 17  | 28  | 0 |   |
| Gelsolin                                                  | P06396 | 0   | 0   | 65  | 42  | 0   | 0   | 0   | 0   | 0   | 22  | 14  | 0   | 65   | 42  | 0   | 1 |   |
| Glucagon                                                  | P01275 | 47  | 54  | 26  | 40  | 172 | 30  | 0   | 34  | 77  | 42  | 81  | 37  | 127  | 242 | 111 | 3 |   |
| Glucose-6-phosphate isomerase                             | P06744 | 0   | 0   | 32  | 32  | 0   | 0   | 22  | 0   | 0   | 11  | 11  | 7   | 32   | 32  | 22  | 1 |   |
| Glucosidase 2 subunit beta                                | P14314 | 0   | 0   | 0   | 48  | 0   | 0   | 0   | 0   | 0   | 0   | 16  | 0   | 0    | 48  | 0   | 0 |   |



|                                                   |        |     |     |     |     |     |     |     |     |     |     |     |     |     |     |     |   |   |
|---------------------------------------------------|--------|-----|-----|-----|-----|-----|-----|-----|-----|-----|-----|-----|-----|-----|-----|-----|---|---|
| Ig kappa chain V-IV region B17                    | P06314 | 0   | 10  | 9   | 11  | 0   | 0   | 0   | 0   | 6   | 4   | 0   | 19  | 11  | 0   | 2   | 1 | 0 |
| Ig lambda chain V-I region NEWM                   | P01703 | 0   | 14  | 15  | 13  | 0   | 9   | 0   | 0   | 0   | 7   | 0   | 29  | 22  | 0   | 2   | 2 | 0 |
| IgG Fc-binding protein                            | Q9Y6R7 | 0   | 0   | 0   | 0   | 0   | 0   | 42  | 0   | 0   | 0   | 14  | 0   | 0   | 42  | 0   | 0 | 1 |
| Immunoglobulin J chain                            | P01591 | 15  | 8   | 0   | 2   | 0   | 11  | 5   | 9   | 14  | 8   | 4   | 9   | 23  | 13  | 28  | 2 | 3 |
| Importin subunit beta-1                           | Q14974 | 0   | 0   | 0   | 0   | 0   | 0   | 22  | 0   | 0   | 0   | 0   | 7   | 0   | 22  | 0   | 1 |   |
| Inner centromere protein                          | Q9NQ57 | 67  | 0   | 0   | 0   | 0   | 0   | 0   | 0   | 22  | 0   | 0   | 67  | 0   | 0   | 1   | 0 |   |
| Insulin                                           | P01308 | 0   | 0   | 0   | 0   | 22  | 0   | 0   | 0   | 0   | 7   | 0   | 0   | 22  | 0   | 0   | 1 | 0 |
| Integrin alpha-M                                  | P11215 | 0   | 0   | 0   | 0   | 0   | 0   | 0   | 0   | 68  | 0   | 0   | 23  | 0   | 68  | 0   | 0 | 1 |
| Junction plakoglobin                              | P14923 | 0   | 0   | 0   | 0   | 43  | 0   | 0   | 0   | 0   | 14  | 0   | 0   | 43  | 0   | 0   | 1 | 0 |
| Keratin, type I cuticular Ha3-I                   | O76009 | 20  | 0   | 0   | 0   | 0   | 0   | 0   | 0   | 7   | 0   | 0   | 20  | 0   | 1   | 0   | 0 |   |
| Keratin, type I cuticular Ha6                     | O76013 | 0   | 0   | 0   | 0   | 0   | 0   | 31  | 0   | 0   | 0   | 10  | 0   | 31  | 0   | 0   | 1 | 0 |
| Keratin, type I cytoskeletal 10                   | P13645 | 272 | 133 | 232 | 116 | 196 | 132 | 149 | 150 | 129 | 212 | 148 | 143 | 637 | 444 | 428 | 3 | 3 |
| Keratin, type I cytoskeletal 14                   | P02533 | 79  | 52  | 79  | 67  | 89  | 43  | 60  | 72  | 112 | 70  | 66  | 81  | 210 | 199 | 244 | 3 | 3 |
| Keratin, type I cytoskeletal 16                   | P08779 | 0   | 0   | 0   | 0   | 0   | 0   | 53  | 0   | 0   | 0   | 0   | 18  | 0   | 53  | 0   | 1 | 0 |
| Keratin, type I cytoskeletal 18                   | P05783 | 0   | 0   | 0   | 0   | 38  | 50  | 62  | 40  | 33  | 0   | 29  | 45  | 0   | 88  | 135 | 0 | 3 |
| Keratin, type I cytoskeletal 19                   | P08727 | 45  | 36  | 79  | 0   | 0   | 52  | 63  | 51  | 66  | 53  | 17  | 60  | 160 | 52  | 180 | 3 | 3 |
| Keratin, type I cytoskeletal 9                    | P35527 | 240 | 99  | 235 | 179 | 278 | 189 | 141 | 146 | 173 | 191 | 215 | 153 | 574 | 646 | 460 | 3 | 3 |
| Keratin, type II cuticular Hb5                    | P78386 | 0   | 0   | 0   | 0   | 0   | 0   | 33  | 0   | 0   | 0   | 0   | 11  | 0   | 33  | 0   | 1 | 0 |
| Keratin, type II cuticular Hb6                    | O43790 | 42  | 0   | 0   | 0   | 0   | 0   | 0   | 0   | 0   | 14  | 0   | 0   | 42  | 0   | 1   | 0 | 0 |
| Keratin, type II cytoskeletal 1                   | P04264 | 331 | 187 | 379 | 196 | 295 | 237 | 190 | 240 | 300 | 299 | 243 | 243 | 897 | 728 | 730 | 3 | 3 |
| Keratin, type II cytoskeletal 2 epidermal         | P35908 | 257 | 109 | 238 | 109 | 175 | 125 | 120 | 121 | 112 | 201 | 136 | 118 | 604 | 409 | 353 | 3 | 3 |
| Keratin, type II cytoskeletal 5                   | P13647 | 153 | 0   | 0   | 0   | 0   | 0   | 69  | 0   | 0   | 51  | 0   | 23  | 153 | 0   | 69  | 1 | 1 |
| Keratin, type II cytoskeletal 7                   | P08729 | 0   | 0   | 0   | 0   | 0   | 0   | 0   | 60  | 0   | 0   | 0   | 20  | 0   | 60  | 0   | 0 | 1 |
| Keratin, type II cytoskeletal 8                   | P05787 | 92  | 38  | 0   | 0   | 0   | 59  | 114 | 60  | 87  | 43  | 20  | 87  | 130 | 59  | 261 | 2 | 3 |
| Lactotransferrin                                  | O2788  | 0   | 0   | 0   | 0   | 0   | 0   | 22  | 0   | 37  | 0   | 0   | 20  | 0   | 59  | 0   | 0 | 2 |
| Laminin subunit alpha-5                           | O15230 | 0   | 99  | 0   | 0   | 0   | 0   | 0   | 0   | 0   | 33  | 0   | 0   | 99  | 0   | 1   | 0 | 0 |
| Lithostathine-1-beta                              | P48304 | 0   | 0   | 0   | 0   | 0   | 5   | 0   | 0   | 0   | 0   | 2   | 0   | 5   | 0   | 0   | 1 | 0 |
| L-lactate dehydrogenase A chain                   | P00338 | 0   | 0   | 0   | 0   | 0   | 0   | 25  | 0   | 30  | 0   | 0   | 18  | 0   | 55  | 0   | 0 | 2 |
| Lumican                                           | P51884 | 0   | 34  | 0   | 25  | 36  | 7   | 9   | 18  | 42  | 11  | 23  | 23  | 34  | 68  | 69  | 1 | 3 |
| Lysozyme C                                        | P61626 | 0   | 0   | 0   | 27  | 0   | 0   | 22  | 0   | 28  | 0   | 9   | 17  | 0   | 50  | 0   | 1 | 2 |
| Lysyl oxidase homolog 1                           | Q08397 | 0   | 0   | 0   | 0   | 48  | 0   | 0   | 0   | 0   | 0   | 16  | 0   | 48  | 0   | 0   | 1 | 0 |
| Macrophage migration inhibitory factor            | P14174 | 0   | 22  | 0   | 0   | 0   | 0   | 24  | 27  | 0   | 7   | 0   | 17  | 22  | 0   | 51  | 1 | 2 |
| Macrophage-capping protein                        | P40121 | 0   | 28  | 0   | 27  | 0   | 0   | 0   | 11  | 19  | 9   | 9   | 10  | 28  | 27  | 30  | 1 | 2 |
| Malate dehydrogenase, mitochondrial               | P40926 | 0   | 12  | 0   | 17  | 19  | 11  | 0   | 22  | 0   | 4   | 16  | 7   | 12  | 47  | 22  | 1 | 1 |
| Matrin-3                                          | P43243 | 45  | 0   | 0   | 42  | 0   | 0   | 0   | 0   | 0   | 15  | 14  | 0   | 45  | 42  | 0   | 1 | 0 |
| Mimecan                                           | P20774 | 0   | 0   | 0   | 0   | 36  | 0   | 0   | 0   | 0   | 0   | 12  | 0   | 36  | 0   | 0   | 1 | 0 |
| Moesin                                            | P26038 | 0   | 0   | 0   | 29  | 0   | 0   | 0   | 0   | 0   | 0   | 10  | 0   | 29  | 0   | 0   | 1 | 0 |
| Mucin-2                                           | Q02817 | 0   | 0   | 0   | 0   | 0   | 0   | 34  | 0   | 0   | 0   | 0   | 11  | 0   | 34  | 0   | 0 | 1 |
| Mucin-5B                                          | Q9HC84 | 0   | 0   | 0   | 0   | 0   | 0   | 0   | 0   | 91  | 0   | 0   | 30  | 0   | 91  | 0   | 0 | 1 |
| Myeloblastin                                      | P24158 | 0   | 0   | 0   | 0   | 0   | 0   | 18  | 0   | 9   | 0   | 0   | 9   | 0   | 27  | 0   | 0 | 2 |
| Myeloperoxidase                                   | P05164 | 92  | 95  | 0   | 72  | 113 | 75  | 109 | 96  | 220 | 62  | 87  | 142 | 187 | 260 | 425 | 2 | 3 |
| Myosin light polypeptide 6                        | P60660 | 0   | 18  | 41  | 19  | 24  | 0   | 15  | 0   | 12  | 20  | 14  | 9   | 59  | 43  | 27  | 2 | 2 |
| Myosin-11                                         | P35749 | 0   | 0   | 185 | 0   | 0   | 0   | 0   | 0   | 0   | 62  | 0   | 0   | 185 | 0   | 1   | 0 | 0 |
| Myosin-14                                         | Q72406 | 0   | 0   | 0   | 0   | 0   | 0   | 123 | 0   | 0   | 0   | 0   | 41  | 0   | 123 | 0   | 0 | 1 |
| Neurosecretory protein VGF                        | O15240 | 0   | 0   | 0   | 0   | 31  | 0   | 0   | 0   | 0   | 10  | 0   | 0   | 31  | 0   | 0   | 1 | 0 |
| Neutrophil elastase                               | P08246 | 40  | 10  | 0   | 0   | 17  | 25  | 53  | 0   | 80  | 17  | 14  | 44  | 50  | 42  | 133 | 2 | 2 |
| Nicotinate phosphoribosyltransferase              | Q6XQN6 | 0   | 0   | 0   | 0   | 0   | 0   | 7   | 0   | 0   | 0   | 0   | 2   | 0   | 7   | 0   | 0 | 1 |
| Nidogen-1                                         | P14543 | 0   | 50  | 53  | 0   | 26  | 0   | 18  | 31  | 63  | 34  | 9   | 37  | 103 | 26  | 112 | 2 | 3 |
| Non-histone chromosomal protein HMG-17            | P05204 | 0   | 0   | 0   | 29  | 0   | 0   | 13  | 0   | 0   | 0   | 10  | 4   | 0   | 29  | 13  | 0 | 1 |
| Non-POU domain-containing octamer-binding protein | Q15233 | 32  | 0   | 0   | 0   | 0   | 0   | 31  | 0   | 0   | 11  | 0   | 10  | 32  | 0   | 31  | 1 | 1 |
| Non-secretory ribonuclease                        | P10153 | 0   | 0   | 0   | 0   | 0   | 7   | 0   | 0   | 0   | 0   | 2   | 0   | 7   | 0   | 0   | 1 | 0 |
| Outer dense fiber protein 3                       | Q96PU9 | 0   | 0   | 0   | 0   | 0   | 0   | 0   | 0   | 14  | 0   | 0   | 5   | 0   | 14  | 0   | 0 | 1 |
| Pancreatic alpha-amylase                          | P04746 | 0   | 0   | 0   | 0   | 29  | 0   | 0   | 0   | 0   | 10  | 0   | 0   | 29  | 0   | 0   | 1 | 0 |
| Pancreatic prohormone                             | P01298 | 40  | 0   | 0   | 0   | 0   | 0   | 0   | 0   | 26  | 13  | 0   | 9   | 40  | 0   | 26  | 1 | 1 |
| Pancreatic triacylglycerol lipase                 | P16233 | 0   | 0   | 0   | 0   | 0   | 27  | 0   | 0   | 0   | 0   | 9   | 0   | 27  | 0   | 0   | 1 | 0 |
| PDZ and LIM domain protein 1                      | O00151 | 0   | 0   | 0   | 0   | 0   | 0   | 18  | 0   | 0   | 0   | 0   | 6   | 0   | 18  | 0   | 0 | 1 |
| Peptidyl-prolyl cis-trans isomerase A             | P62937 | 47  | 44  | 35  | 53  | 29  | 50  | 42  | 72  | 33  | 42  | 44  | 49  | 126 | 132 | 147 | 3 | 3 |
| Peptidyl-prolyl cis-trans isomerase FKBP11        | Q9NYL4 | 0   | 0   | 0   | 0   | 0   | 5   | 0   | 20  | 0   | 0   | 2   | 7   | 0   | 20  | 0   | 1 | 1 |
| Periostin                                         | Q15063 | 0   | 66  | 0   | 46  | 34  | 0   | 0   | 0   | 56  | 22  | 27  | 19  | 66  | 80  | 56  | 1 | 1 |
| Peroxiredoxin-1                                   | Q06830 | 20  | 30  | 26  | 25  | 0   | 0   | 0   | 18  | 0   | 25  | 8   | 6   | 76  | 25  | 18  | 3 | 1 |
| Peroxiredoxin-4                                   | Q13162 | 0   | 0   | 0   | 21  | 10  | 23  | 9   | 40  | 0   | 0   | 18  | 16  | 0   | 54  | 49  | 0 | 2 |



|                                               |        |     |     |     |     |     |    |    |     |     |     |     |    |     |     |     |   |   |   |
|-----------------------------------------------|--------|-----|-----|-----|-----|-----|----|----|-----|-----|-----|-----|----|-----|-----|-----|---|---|---|
| Tripeptidyl-peptidase 1                       | O14773 | 0   | 0   | 0   | 0   | 0   | 0  | 11 | 0   | 19  | 0   | 0   | 10 | 0   | 30  | 0   | 0 | 2 |   |
| Tropomyosin alpha-1 chain                     | P09493 | 0   | 0   | 67  | 0   | 29  | 0  | 0  | 0   | 22  | 10  | 0   | 67 | 29  | 0   | 1   | 1 | 0 |   |
| Tropomyosin alpha-4 chain                     | P67936 | 20  | 0   | 0   | 29  | 0   | 14 | 20 | 20  | 30  | 7   | 14  | 23 | 20  | 43  | 70  | 1 | 2 | 3 |
| Tropomyosin beta chain                        | P07951 | 0   | 0   | 88  | 0   | 0   | 0  | 0  | 0   | 0   | 29  | 0   | 0  | 88  | 0   | 0   | 1 | 0 | 0 |
| Trypsin-1                                     | P07477 | 116 | 0   | 0   | 82  | 0   | 80 | 47 | 92  | 0   | 39  | 54  | 46 | 116 | 162 | 139 | 1 | 2 | 2 |
| Trypsin-2                                     | P07478 | 0   | 0   | 0   | 69  | 67  | 73 | 0  | 69  | 0   | 0   | 70  | 23 | 0   | 209 | 69  | 0 | 3 | 1 |
| Trypsin-3                                     | P35030 | 0   | 0   | 0   | 0   | 0   | 0  | 0  | 63  | 0   | 0   | 0   | 21 | 0   | 0   | 63  | 0 | 0 | 1 |
| Tryptase alpha/beta-1                         | Q15661 | 22  | 0   | 26  | 17  | 22  | 32 | 0  | 36  | 49  | 16  | 24  | 28 | 48  | 71  | 85  | 2 | 3 | 2 |
| Tryptophan--tRNA ligase, cytoplasmic          | P23381 | 0   | 0   | 0   | 13  | 0   | 0  | 0  | 0   | 0   | 0   | 4   | 0  | 0   | 13  | 0   | 0 | 1 | 0 |
| Tubulin alpha-1A chain                        | Q71U36 | 0   | 0   | 0   | 0   | 38  | 0  | 0  | 0   | 0   | 0   | 13  | 0  | 0   | 38  | 0   | 0 | 1 | 0 |
| Tubulin alpha-1B chain                        | P68363 | 0   | 0   | 32  | 0   | 0   | 0  | 0  | 0   | 0   | 11  | 0   | 0  | 32  | 0   | 0   | 1 | 0 | 0 |
| Tubulin alpha-1C chain                        | Q9BQE3 | 0   | 14  | 0   | 23  | 0   | 34 | 40 | 16  | 0   | 5   | 19  | 19 | 14  | 57  | 56  | 1 | 2 | 2 |
| Tubulin beta chain                            | P07437 | 37  | 54  | 32  | 19  | 41  | 41 | 49 | 0   | 54  | 41  | 34  | 34 | 123 | 101 | 103 | 3 | 3 | 2 |
| Tubulin beta-4B chain                         | P68371 | 0   | 0   | 0   | 0   | 0   | 0  | 45 | 25  | 0   | 0   | 0   | 23 | 0   | 0   | 70  | 0 | 0 | 2 |
| Tubulin-specific chaperone A                  | O75347 | 0   | 0   | 0   | 0   | 0   | 0  | 9  | 0   | 0   | 0   | 0   | 3  | 0   | 9   | 0   | 0 | 0 | 1 |
| Ubiquitin-40S ribosomal protein S27a          | P62979 | 62  | 48  | 59  | 44  | 0   | 55 | 0  | 40  | 0   | 56  | 33  | 13 | 169 | 99  | 40  | 3 | 2 | 1 |
| Ubiquitin-60S ribosomal protein L40           | P62987 | 0   | 0   | 0   | 0   | 38  | 0  | 40 | 0   | 0   | 0   | 13  | 13 | 0   | 38  | 40  | 0 | 1 | 1 |
| Ubiquitin-like modifier-activating enzyme 1   | P22314 | 45  | 0   | 0   | 0   | 0   | 0  | 0  | 0   | 0   | 15  | 0   | 0  | 45  | 0   | 0   | 1 | 0 | 0 |
| Versican core protein                         | P13611 | 84  | 109 | 0   | 57  | 69  | 0  | 0  | 74  | 73  | 64  | 42  | 49 | 193 | 126 | 147 | 2 | 2 | 2 |
| Vimentin                                      | P08670 | 104 | 135 | 109 | 78  | 134 | 96 | 74 | 103 | 108 | 116 | 103 | 95 | 348 | 308 | 285 | 3 | 3 | 3 |
| Vinculin                                      | P18206 | 82  | 68  | 111 | 107 | 105 | 84 | 82 | 101 | 0   | 87  | 99  | 61 | 261 | 296 | 183 | 3 | 3 | 2 |
| Vitronectin                                   | P04004 | 0   | 18  | 0   | 0   | 0   | 0  | 0  | 0   | 40  | 6   | 0   | 13 | 18  | 0   | 40  | 1 | 0 | 1 |
| V-type proton ATPase subunit B, brain isoform | P21281 | 0   | 0   | 0   | 23  | 0   | 0  | 11 | 0   | 0   | 0   | 8   | 4  | 0   | 23  | 11  | 0 | 1 | 1 |

AIP: autoimmune pancreatitis; CP: chronic pancreatitis; PC: pancreatic cancer

**Supplementary Table 2.** Twenty-four proteins identified in both autoimmune pancreatitis and chronic pancreatitis specimens and not in pancreatic cancer specimens, as illustrated in the Venn diagram in Figure 2.

| Protein names                                              | UniProt ID | Spectral counts |       |       |      |      |      | Mean spectral counts |     | Total spectral counts |     | No. of specimens |    |
|------------------------------------------------------------|------------|-----------------|-------|-------|------|------|------|----------------------|-----|-----------------------|-----|------------------|----|
|                                                            |            | AIP#1           | AIP#2 | AIP#3 | CP#1 | CP#2 | CP#3 | AIP                  | CP  | AIP                   | CP  | AIP              | CP |
| 60S ribosomal protein L23                                  | P62829     | 35              | 0     | 0     | 42   | 0    | 36   | 12                   | 26  | 35                    | 78  | 1                | 2  |
| 60S ribosomal protein L26                                  | P61254     | 20              | 0     | 0     | 29   | 26   | 39   | 7                    | 31  | 20                    | 94  | 1                | 3  |
| 60S ribosomal protein L34                                  | P49207     | 0               | 28    | 0     | 27   | 31   | 0    | 9                    | 19  | 28                    | 58  | 1                | 2  |
| Asporin                                                    | Q9BXN1     | 7               | 0     | 0     | 0    | 41   | 0    | 2                    | 14  | 7                     | 41  | 1                | 1  |
| Chymotrypsin-like elastase family member 3A                | P09093     | 0               | 0     | 9     | 0    | 14   | 32   | 3                    | 15  | 9                     | 46  | 1                | 2  |
| Complement C3                                              | P01024     | 82              | 87    | 0     | 0    | 96   | 103  | 56                   | 66  | 169                   | 199 | 2                | 2  |
| Decorin                                                    | P07585     | 47              | 58    | 0     | 38   | 79   | 0    | 35                   | 39  | 105                   | 117 | 2                | 2  |
| Fibrinogen alpha chain                                     | P02671     | 0               | 64    | 0     | 0    | 0    | 98   | 21                   | 33  | 64                    | 98  | 1                | 1  |
| Fibrinogen beta chain                                      | P02675     | 0               | 58    | 0     | 0    | 0    | 62   | 19                   | 21  | 58                    | 62  | 1                | 1  |
| Gelsolin                                                   | P06396     | 0               | 0     | 65    | 42   | 0    | 0    | 22                   | 14  | 65                    | 42  | 1                | 1  |
| Heat shock 70 kDa protein 1A/1B                            | P08107     | 0               | 0     | 59    | 0    | 36   | 0    | 20                   | 12  | 59                    | 36  | 1                | 1  |
| Hemoglobin subunit delta                                   | P02042     | 0               | 137   | 0     | 69   | 0    | 0    | 46                   | 23  | 137                   | 69  | 1                | 1  |
| Histone H2A.V                                              | Q71UI9     | 32              | 40    | 0     | 27   | 0    | 0    | 24                   | 9   | 72                    | 27  | 2                | 1  |
| Histone H2B type 1-M                                       | Q99879     | 0               | 155   | 0     | 185  | 120  | 0    | 52                   | 102 | 155                   | 305 | 1                | 2  |
| Ig kappa chain V-III region VG                             | P04433     | 0               | 10    | 0     | 11   | 0    | 0    | 3                    | 4   | 10                    | 11  | 1                | 1  |
| Ig kappa chain V-IV region B17                             | P06314     | 0               | 10    | 9     | 11   | 0    | 0    | 6                    | 4   | 19                    | 11  | 2                | 1  |
| Ig lambda chain V-I region NEWM                            | P01703     | 0               | 14    | 15    | 13   | 0    | 9    | 10                   | 7   | 29                    | 22  | 2                | 2  |
| Matrin-3                                                   | P43243     | 45              | 0     | 0     | 42   | 0    | 0    | 15                   | 14  | 45                    | 42  | 1                | 1  |
| Plasma cell-induced resident endoplasmic reticulum protein | Q8WU39     | 25              | 36    | 15    | 34   | 0    | 0    | 25                   | 11  | 76                    | 34  | 3                | 1  |
| Probable phosphoglycerate mutase 4                         | Q8N0Y7     | 0               | 14    | 0     | 0    | 26   | 0    | 5                    | 9   | 14                    | 26  | 1                | 1  |
| Prolargin                                                  | P51888     | 0               | 40    | 0     | 21   | 0    | 0    | 13                   | 7   | 40                    | 21  | 1                | 1  |
| T-complex protein 1 subunit beta                           | P78371     | 25              | 0     | 0     | 25   | 0    | 0    | 8                    | 8   | 25                    | 25  | 1                | 1  |
| Thrombospondin-1                                           | P07996     | 0               | 52    | 0     | 78   | 0    | 48   | 17                   | 42  | 52                    | 126 | 1                | 2  |
| Tropomyosin alpha-1 chain                                  | P09493     | 0               | 0     | 67    | 0    | 29   | 0    | 22                   | 10  | 67                    | 29  | 1                | 1  |

**AIP: autoimmune pancreatitis; CP: chronic pancreatitis**



**Supplementary Table 3.** Nineteen proteins identified in both autoimmune pancreatitis and pancreatic cancer specimens and not in chronic pancreatitis specimens, as illustrated in the Venn diagram in Figure 2.

| Protein names                                     | UniProt ID | Spectral counts |       |       |      |      |      | Mean spectral counts |    | Total spectral counts |     | No. of specimens |    |
|---------------------------------------------------|------------|-----------------|-------|-------|------|------|------|----------------------|----|-----------------------|-----|------------------|----|
|                                                   |            | AIP#1           | AIP#2 | AIP#3 | PC#1 | PC#2 | PC#3 | AIP                  | PC | AIP                   | PC  | AIP              | PC |
| 40S ribosomal protein S12                         | P25398     | 0               | 10    | 0     | 0    | 27   | 0    | 3                    | 9  | 10                    | 27  | 1                | 1  |
| Actin, aortic smooth muscle                       | P62736     | 0               | 0     | 493   | 294  | 0    | 0    | 164                  | 98 | 493                   | 294 | 1                | 1  |
| Alpha-actinin-1                                   | P12814     | 0               | 0     | 79    | 0    | 0    | 37   | 26                   | 12 | 79                    | 37  | 1                | 1  |
| Caldesmon                                         | Q05682     | 0               | 0     | 147   | 51   | 0    | 0    | 49                   | 17 | 147                   | 51  | 1                | 1  |
| Desmin                                            | P17661     | 109             | 0     | 197   | 67   | 0    | 0    | 102                  | 22 | 306                   | 67  | 2                | 1  |
| Fibrillin-2                                       | P35556     | 0               | 70    | 0     | 0    | 49   | 0    | 23                   | 16 | 70                    | 49  | 1                | 1  |
| Heterogeneous nuclear ribonucleoprotein U         | Q00839     | 104             | 0     | 0     | 87   | 0    | 0    | 35                   | 29 | 104                   | 87  | 1                | 1  |
| Histone H2A type 1-C                              | Q93077     | 0               | 97    | 0     | 0    | 87   | 75   | 32                   | 54 | 97                    | 162 | 1                | 2  |
| Histone H2B type 1-D                              | P58876     | 0               | 0     | 185   | 0    | 119  | 0    | 62                   | 40 | 185                   | 119 | 1                | 1  |
| Keratin, type II cytoskeletal 5                   | P13647     | 153             | 0     | 0     | 69   | 0    | 0    | 51                   | 23 | 153                   | 69  | 1                | 1  |
| Macrophage migration inhibitory factor            | P14174     | 0               | 22    | 0     | 24   | 27   | 0    | 7                    | 17 | 22                    | 51  | 1                | 2  |
| Non-POU domain-containing octamer-binding protein | Q15233     | 32              | 0     | 0     | 31   | 0    | 0    | 11                   | 10 | 32                    | 31  | 1                | 1  |
| Pancreatic prohormone                             | P01298     | 40              | 0     | 0     | 0    | 0    | 26   | 13                   | 9  | 40                    | 26  | 1                | 1  |
| Plastin-2                                         | P13796     | 45              | 54    | 44    | 0    | 45   | 0    | 48                   | 15 | 143                   | 45  | 3                | 1  |
| Protein S100-A6                                   | P06703     | 0               | 6     | 0     | 7    | 0    | 7    | 2                    | 5  | 6                     | 14  | 1                | 2  |
| Splicing factor, proline- and glutamine-rich      | P23246     | 0               | 56    | 0     | 54   | 0    | 63   | 19                   | 39 | 56                    | 117 | 1                | 2  |
| Succinate dehydrogenase                           | P31040     | 27              | 0     | 44    | 20   | 0    | 0    | 24                   | 7  | 71                    | 20  | 2                | 1  |
| Transitional endoplasmic reticulum ATPase         | P55072     | 0               | 54    | 0     | 51   | 49   | 0    | 18                   | 33 | 54                    | 100 | 1                | 2  |
| Vitronectin                                       | P04004     | 0               | 18    | 0     | 0    | 0    | 40   | 6                    | 13 | 18                    | 40  | 1                | 1  |

AIP: autoimmune pancreatitis; PC: pancreatic cancer

**Supplementary Table 4.** Forty-nine proteins identified in both chronic pancreatitis and pancreatic cancer specimens and not in the autoimmune pancreatitis specimens, as illustrated in the Venn diagram in Figure 2.

| Protein names                               | UniProt ID | Spectral counts |      |      |      |      |      | Mean spectral counts |     | Total spectral counts |     | No. of specimens |    |
|---------------------------------------------|------------|-----------------|------|------|------|------|------|----------------------|-----|-----------------------|-----|------------------|----|
|                                             |            | CP#1            | CP#2 | CP#3 | PC#1 | PC#2 | PC#3 | CP                   | PC  | CP                    | PC  | CP               | PC |
| 14-3-3 protein gamma                        | P61981     | 0               | 0    | 32   | 34   | 0    | 33   | 11                   | 22  | 32                    | 67  | 1                | 2  |
| 14-3-3 protein theta                        | P27348     | 17              | 12   | 0    | 16   | 0    | 12   | 10                   | 9   | 29                    | 28  | 2                | 2  |
| 40S ribosomal protein S10                   | P46783     | 2               | 0    | 0    | 9    | 18   | 0    | 1                    | 9   | 2                     | 27  | 1                | 2  |
| 40S ribosomal protein S14                   | P62263     | 0               | 0    | 36   | 29   | 20   | 0    | 12                   | 16  | 36                    | 49  | 1                | 2  |
| 40S ribosomal protein S15a                  | P62244     | 19              | 0    | 32   | 20   | 0    | 0    | 17                   | 7   | 51                    | 20  | 2                | 1  |
| 40S ribosomal protein S28                   | P62857     | 23              | 0    | 0    | 0    | 16   | 0    | 8                    | 5   | 23                    | 16  | 1                | 1  |
| 40S ribosomal protein S4, X isoform         | P62701     | 0               | 0    | 27   | 0    | 47   | 0    | 9                    | 16  | 27                    | 47  | 1                | 1  |
| 40S ribosomal protein S6                    | P62753     | 38              | 43   | 57   | 38   | 0    | 0    | 46                   | 13  | 138                   | 38  | 3                | 1  |
| 60S ribosomal protein L14                   | P50914     | 36              | 0    | 39   | 0    | 63   | 0    | 25                   | 21  | 75                    | 63  | 2                | 1  |
| 60S ribosomal protein L29                   | P47914     | 55              | 0    | 34   | 0    | 60   | 0    | 30                   | 20  | 89                    | 60  | 2                | 1  |
| 60S ribosomal protein L35                   | P42766     | 21              | 0    | 0    | 24   | 0    | 0    | 7                    | 8   | 21                    | 24  | 1                | 1  |
| Alpha-amylase 2B                            | P19961     | 32              | 0    | 0    | 0    | 25   | 0    | 11                   | 8   | 32                    | 25  | 1                | 1  |
| ATP-citrate synthase                        | P53396     | 0               | 57   | 0    | 38   | 0    | 0    | 19                   | 13  | 57                    | 38  | 1                | 1  |
| Brain acid soluble protein 1                | P80723     | 6               | 0    | 0    | 0    | 0    | 16   | 2                    | 5   | 6                     | 16  | 1                | 1  |
| Carboxypeptidase B                          | P15086     | 0               | 0    | 21   | 0    | 22   | 0    | 7                    | 7   | 21                    | 22  | 1                | 1  |
| Cartilage oligomeric matrix protein         | P49747     | 21              | 0    | 0    | 0    | 0    | 26   | 7                    | 9   | 21                    | 26  | 1                | 1  |
| Chymotrypsin-like elastase family member 2A | P08217     | 17              | 0    | 30   | 0    | 13   | 0    | 16                   | 4   | 47                    | 13  | 2                | 1  |
| Collagen alpha-2                            | P08123     | 0               | 0    | 173  | 0    | 193  | 201  | 58                   | 131 | 173                   | 394 | 1                | 2  |
| C-type mannose receptor 2                   | Q9UBG0     | 0               | 0    | 34   | 0    | 0    | 26   | 11                   | 9   | 34                    | 26  | 1                | 1  |
| D-3-phosphoglycerate dehydrogenase          | O43175     | 25              | 0    | 30   | 0    | 40   | 0    | 18                   | 13  | 55                    | 40  | 2                | 1  |
| Elongation factor 1-gamma                   | P26641     | 23              | 0    | 0    | 20   | 31   | 0    | 8                    | 17  | 23                    | 51  | 1                | 2  |
| Elongation factor 2                         | P13639     | 40              | 0    | 0    | 0    | 51   | 0    | 13                   | 17  | 40                    | 51  | 1                | 1  |
| Endoplasmin                                 | P14625     | 36              | 0    | 0    | 33   | 0    | 0    | 12                   | 11  | 36                    | 33  | 1                | 1  |
| Ferritin heavy chain                        | P02794     | 6               | 31   | 0    | 0    | 0    | 23   | 12                   | 8   | 37                    | 23  | 2                | 1  |
| Gamma-glutamyltransferase 5                 | P36269     | 0               | 17   | 0    | 0    | 0    | 28   | 6                    | 9   | 17                    | 28  | 1                | 1  |
| Heat shock cognate 71 kDa protein           | P11142     | 27              | 0    | 0    | 58   | 0    | 0    | 9                    | 19  | 27                    | 58  | 1                | 1  |
| Histone H1.5                                | P16401     | 78              | 0    | 0    | 0    | 0    | 84   | 26                   | 28  | 78                    | 84  | 1                | 1  |
| Histone H2A type 2-C                        | Q16777     | 67              | 0    | 112  | 85   | 0    | 0    | 60                   | 28  | 179                   | 85  | 2                | 1  |
| Histone H2B type 1-J                        | P06899     | 0               | 98   | 0    | 129  | 0    | 0    | 33                   | 43  | 98                    | 129 | 1                | 1  |
| Histone H3.2                                | Q71DI3     | 126             | 0    | 0    | 85   | 0    | 105  | 42                   | 63  | 126                   | 190 | 1                | 2  |
| Ig kappa chain V-III region HIC             | P18136     | 21              | 0    | 0    | 2    | 0    | 0    | 7                    | 1   | 21                    | 2   | 1                | 1  |
| Keratin, type I cytoskeletal 18             | P05783     | 0               | 38   | 50   | 62   | 40   | 33   | 29                   | 45  | 88                    | 135 | 2                | 3  |
| Lysozyme C                                  | P61626     | 27              | 0    | 0    | 22   | 0    | 28   | 9                    | 17  | 27                    | 50  | 1                | 2  |
| Non-histone chromosomal protein HMG-17      | P05204     | 29              | 0    | 0    | 13   | 0    | 0    | 10                   | 4   | 29                    | 13  | 1                | 1  |
| Peptidyl-prolyl cis-trans isomerase FKBP11  | Q9NYL4     | 0               | 0    | 5    | 0    | 20   | 0    | 2                    | 7   | 5                     | 20  | 1                | 1  |
| Peroxiredoxin-4                             | Q13162     | 21              | 10   | 23   | 9    | 40   | 0    | 18                   | 16  | 54                    | 49  | 3                | 2  |
| Phosphatidylethanolamine-binding protein 1  | P30086     | 0               | 7    | 0    | 0    | 9    | 0    | 2                    | 3   | 7                     | 9   | 1                | 1  |
| Plectin                                     | Q15149     | 0               | 242  | 0    | 0    | 0    | 265  | 81                   | 88  | 242                   | 265 | 1                | 1  |
| Protein CutA                                | O60888     | 8               | 12   | 0    | 7    | 0    | 0    | 7                    | 2   | 20                    | 7   | 2                | 1  |
| Protein disulfide-isomerase A2              | Q13087     | 0               | 0    | 36   | 0    | 49   | 0    | 12                   | 16  | 36                    | 49  | 1                | 1  |
| Protein S100-A9                             | P06702     | 0               | 14   | 0    | 11   | 0    | 63   | 5                    | 25  | 14                    | 74  | 1                | 2  |
| Ribosome-binding protein 1                  | Q9P2E9     | 0               | 0    | 91   | 0    | 154  | 0    | 30                   | 51  | 91                    | 154 | 1                | 1  |
| Serpin H1                                   | P50454     | 25              | 0    | 27   | 25   | 0    | 30   | 17                   | 18  | 52                    | 55  | 2                | 2  |

|                                               |        |    |    |    |    |    |    |    |    |     |     |   |   |
|-----------------------------------------------|--------|----|----|----|----|----|----|----|----|-----|-----|---|---|
| T-complex protein 1 subunit epsilon           | P48643 | 42 | 46 | 0  | 38 | 29 | 0  | 29 | 22 | 88  | 67  | 2 | 2 |
| Tenascin                                      | P24821 | 63 | 0  | 0  | 49 | 0  | 0  | 21 | 16 | 63  | 49  | 1 | 1 |
| Transketolase                                 | P29401 | 0  | 60 | 0  | 47 | 40 | 40 | 20 | 42 | 60  | 127 | 1 | 3 |
| Trypsin-2                                     | P07478 | 69 | 67 | 73 | 0  | 69 | 0  | 70 | 23 | 209 | 69  | 3 | 1 |
| Ubiquitin-60S ribosomal protein L40           | P62987 | 0  | 38 | 0  | 40 | 0  | 0  | 13 | 13 | 38  | 40  | 1 | 1 |
| V-type proton ATPase subunit B, brain isoform | P21281 | 23 | 0  | 0  | 11 | 0  | 0  | 8  | 4  | 23  | 11  | 1 | 1 |

CP: chronic pancreatitis; PC: pancreatic cancer
